# Supplementary material
Source: PubMed Central journal article supplement (PMC6020813)
Supplement: ba012369-suppl2.pdf [file ba012369-suppl2.pdf]

**Supplemental Table 1. Antibodies used for study.**

| Marker                   | Clone  | Fluorochrome | Manufactory    |
|--------------------------|--------|--------------|----------------|
| CD3                      | OKT3   | BV785        | Biologend      |
| CD56                     | NCAM   | PE/CY7       | Biologend      |
| CD16                     | 3G8    | AF700        | Biologend      |
| TIGIT                    | 741182 | APC          | R&D systems    |
| CD45                     | HI30   | BV605/BV711  | BD Biosciences |
| CD7                      | M-T701 | APC          | BD Biosciences |
| pSTAT5                   | pY694  | AF488/APC    | BD Biosciences |
| CellTrace                |        | Violet       | Invitrogen     |
| CellTrace                |        | Far Red      | Invitrogen     |
| CellTrace Calcein        |        | Green        | Invitrogen     |
| CD107a                   | H4A3   | PerCP/Cy5.5  | Biologend      |
| IFN $\gamma$             | 4S.B3  | BV650        | Biologend      |
| Ki67                     | B56    | AF700        | BD Biosciences |
| Fixable dead cell marker |        | Near-IR      | Invitrogen     |

## Supplemental Figure 1.

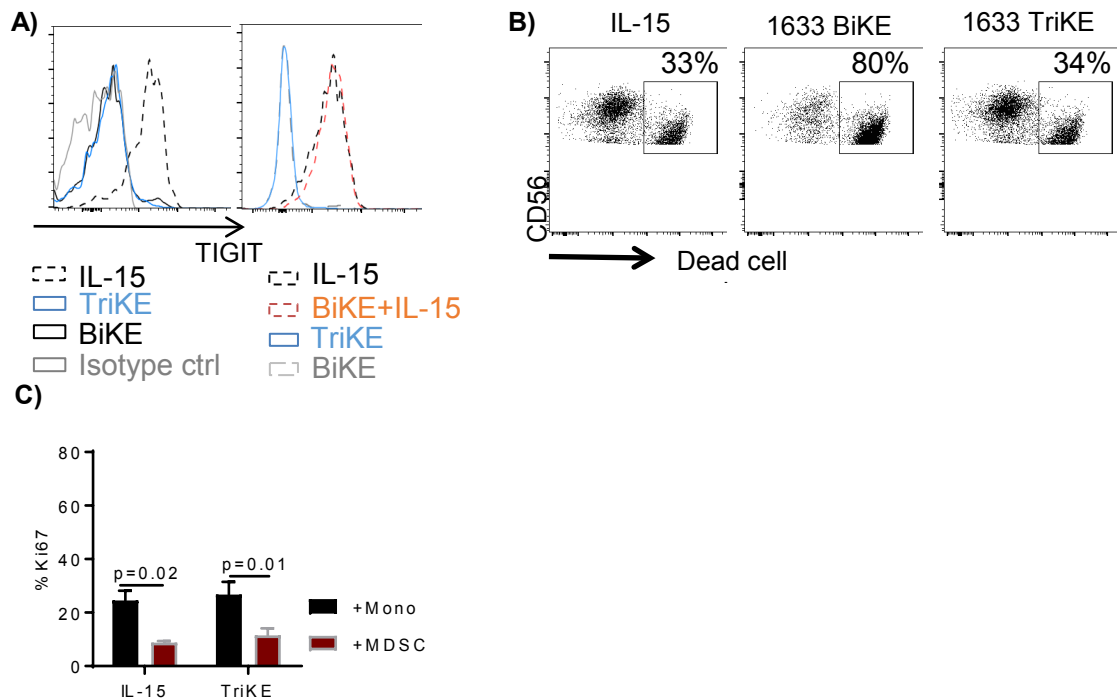

## Supplemental Figure 1.

**A)** Purified HD-NK cells (n=5) HD were stimulated with IL-15 (10 nM), agonistic anti-CD16 (1  $\mu$ g/ml), IL-15+anti-CD16, or left unstimulated for 25 min prior analysis of STAT5 phosphorylation. Representative gating strategy is shown. **B)** Purified HD-NK cells (n=6) were co-cultured with autologous monocytes for 5 days in the presence of IL-15 (equal-molar concentration to the IL-15 in the TriKE), BiKE (50 nM), or TriKE (50 nM). NK cells were analyzed for viability. One representative donor is shown. **C)** Purified HD-NK cells (n=4) were pre-treated with IL-15 or TriKE (50 nM) overnight prior extensive wash. Subsequently, NK cells were co-cultured with autologous monocytes or MDSC for 5 days and analyzed for proliferation (Ki67). Data are shown as mean $\pm$ SEM and statistical analyses were performed using paired t-test.

## Supplemental Figure 2.

A

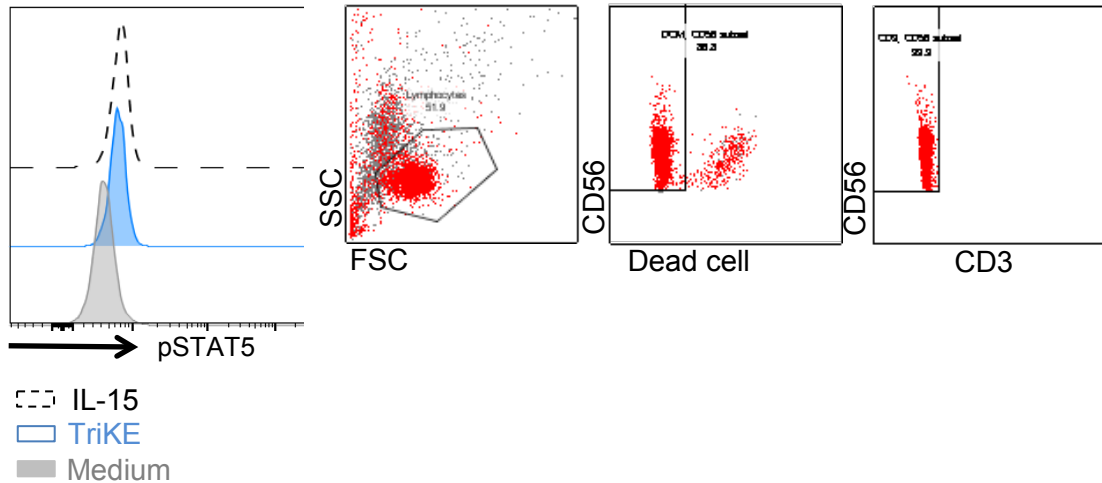

B

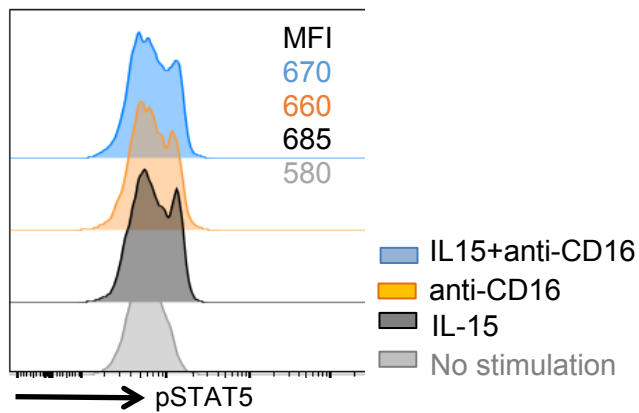

## Supplemental Figure 2.

A) Isolated NK cells (n=9), by negative depletion, from healthy blood donors were stimulated with IL-15 (equal-molar concentration to the IL-15 in the TriKE (50 nM), Bike (50 nM), BiKE + IL-15 (both 50 nM), or TriKE (50 nM) with or without HL60 targets for 25 minutes before fixation and STAT5 phosphorylation analysis. Alternately, purified HD-NK cells (n=5) HD were stimulated with IL-15 (10 nM), agonistic anti-CD16 (1  $\mu\text{g}/\text{ml}$ ), IL-15+anti-CD16, or left unstimulated prior analysis of STAT5 phosphorylation. Representative data are shown.

### Supplemental Figure 3.

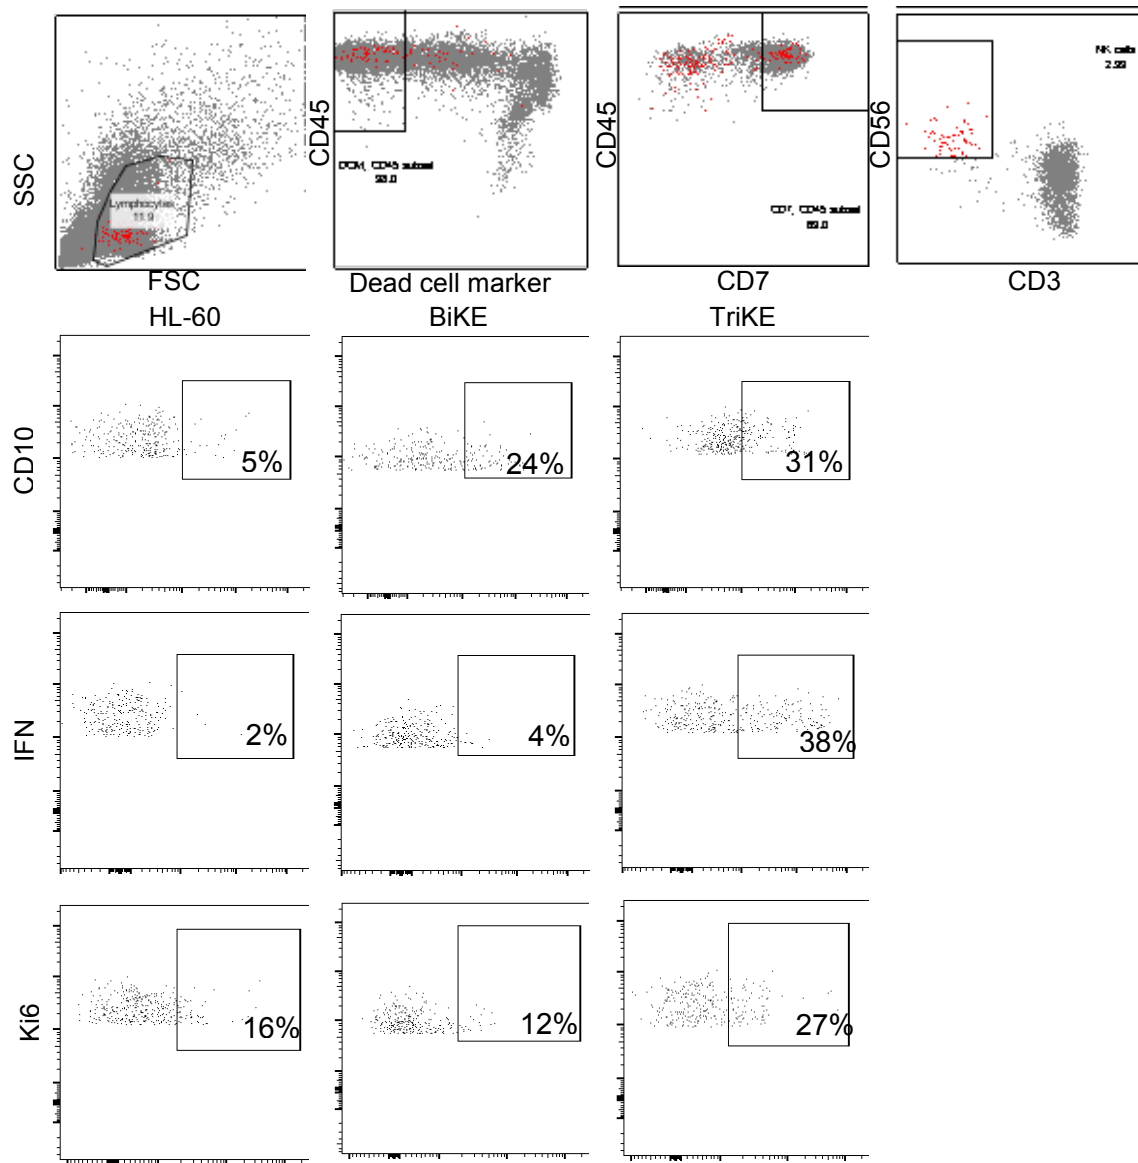

### Supplemental Figure 3.

Cryopreserved PBMC from MDS patients were activated overnight with BiKE (50 nM), or TriKE (50 nM). Target cells were then added 6h prior to staining. NK cell degranulation (CD107a), IFN $\gamma$  production, and proliferation (Ki67) were evaluated. A representative gating strategy is shown.

## Supplemental Figure 4.

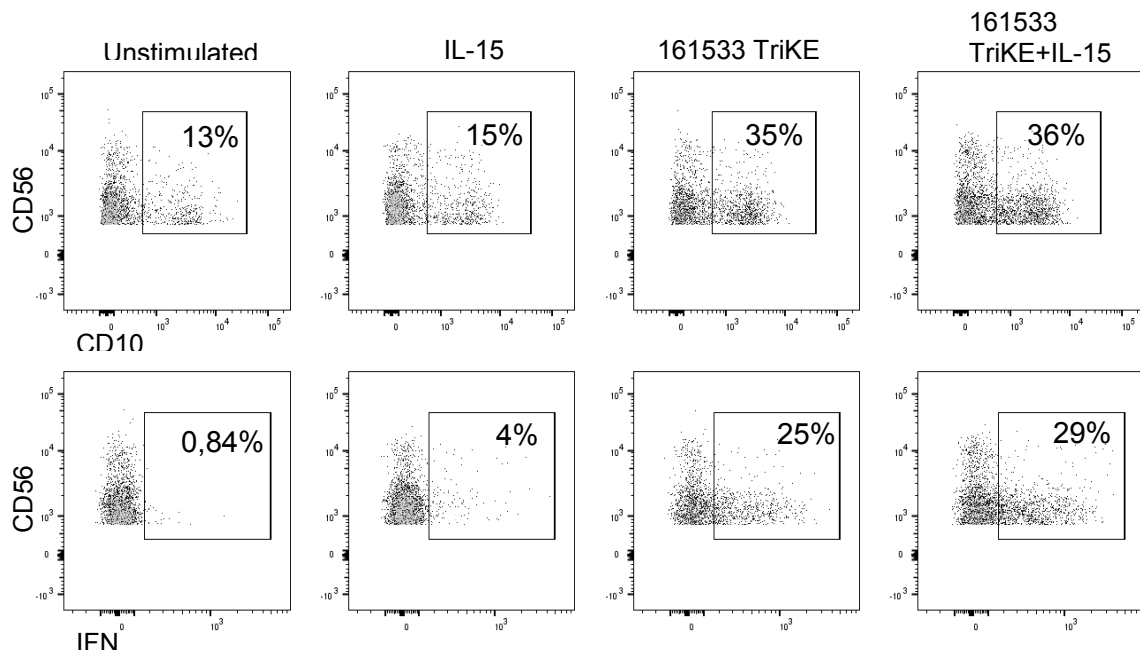

## Supplemental Figure 4.

Cryopreserved PBMC from HD were activated overnight with IL-15, 161533 TriKE, 161533 TriKE+IL-15, or left untreated and analyzed for NK cell degranulation and IFN $\gamma$ . One representative donor (n= 4) is shown.
